# Supplementary material for: Inorganic process for wet silica-doping of calcium phosphate
Source: Royal Society of Chemistry journal article supplement (doi:10.1039/d1ra00288k), 2021-01-01
Supplement: d1ra00288k1.pdf [file d1ra00288k1.pdf]

Supporting Information: Inorganic process for wet-silica doping of calcium  
phosphate

Yuki Sugiura, Kodai Niitsu, Yasuko Saito, Takashi Endo, Masanori Horie

#### Fabrication of silica substituted apatite from OCP-silica

First, 0.4 of OCP-silica powder was immersed in 20 mL of 0.0–2.0 mol/L  $(\text{NH}_4)_2\text{CO}_3$  solution at 80 °C for three days. The treated OCP-silica powders were washed with distilled water several times and then oven-dried at 80 °C overnight.

#### Fabrication of OCP-silica granules.

Precursor DCPA granules were fabricated as analogs of the dental brushite cement setting reaction. Calcium dihydrogen phosphate hydrate and  $\beta$ -TCP were mixed at a 1:1 molar ratio using an agate mortar and pestle. Then, ~1g of the mixture was placed into a rotary pan-type granulator (PZ-01R, As One Co., Japan) with stirring at 40 rpm. Thereafter, approximately 1.0 mL of distilled water was added as a spray to obtain granules of acidic calcium phosphate. The set mixture was continuously stirred for 10 min and then placed in a dry oven at 40 °C overnight. The dried set mixture was separated using an automatic sieve of 250–500  $\mu\text{m}$ .

Then, ~1.0 g of DCPA granules was immersed in 20 mL of 1 mol/L  $\text{Na}_2\text{SiO}_3$  at 60 °C for two days. The treated granules were then washed with distilled water several times and placed in a dry oven at 40 °C to remove residual moisture.

#### Fabrication of apatite–silica granules from OCP-silica granules.

First, ~0.4 g of fabricated OCP-silica granules was immersed in 20 mL of 0.0–2.0  $(\text{NH}_4)_2\text{CO}_3$  solutions at 80 °C for three days. The treated granules were then washed with distilled water several times and placed in a dry oven at 40 °C to remove residual moisture.

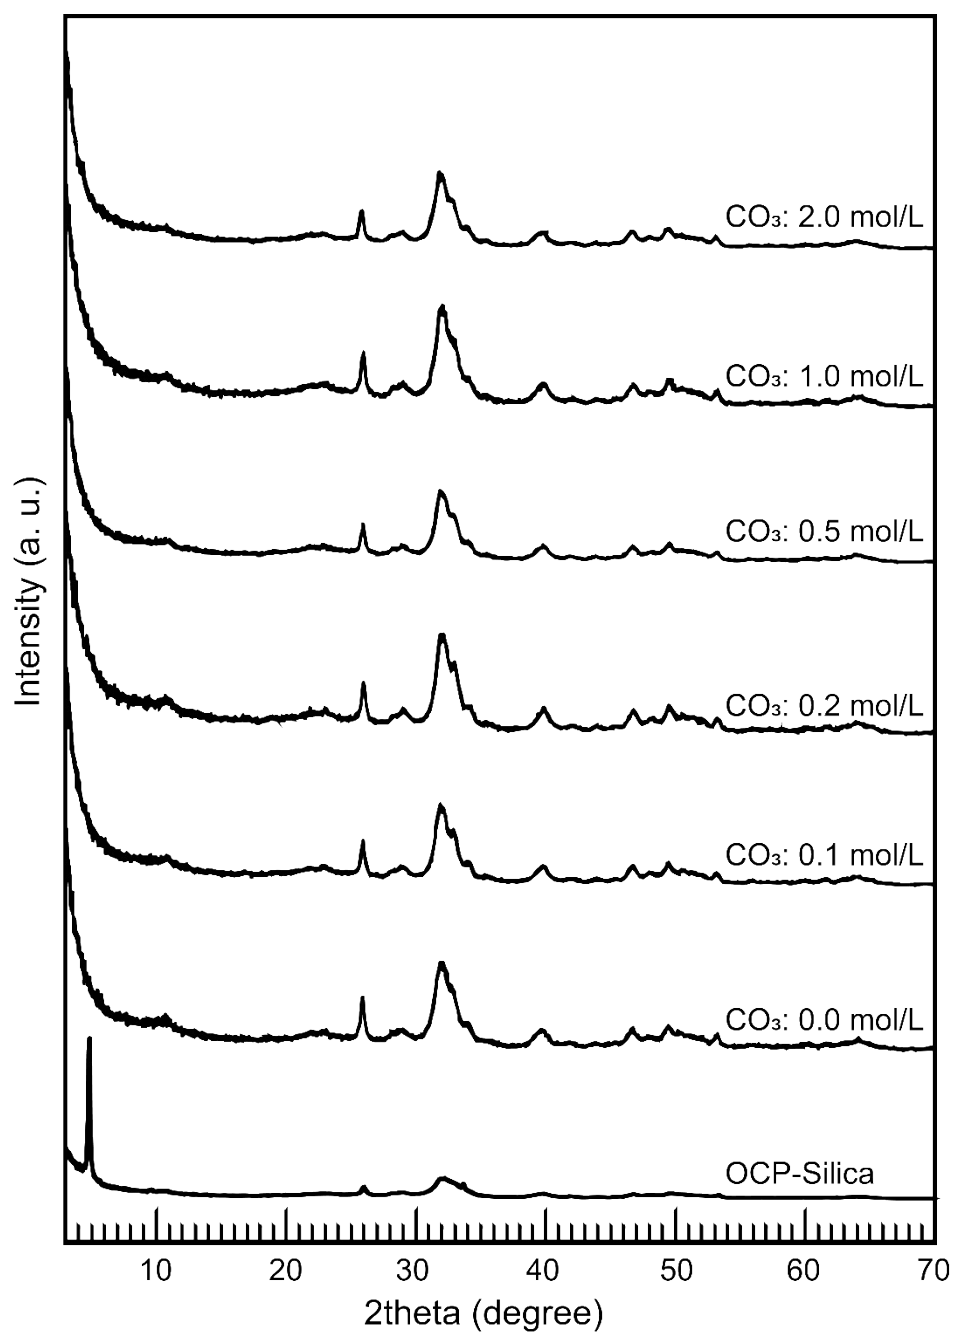

Figure S1. XRD patterns of OCP-silica treated in various  $(\text{NH}_4)_2\text{CO}_3$  solutions.

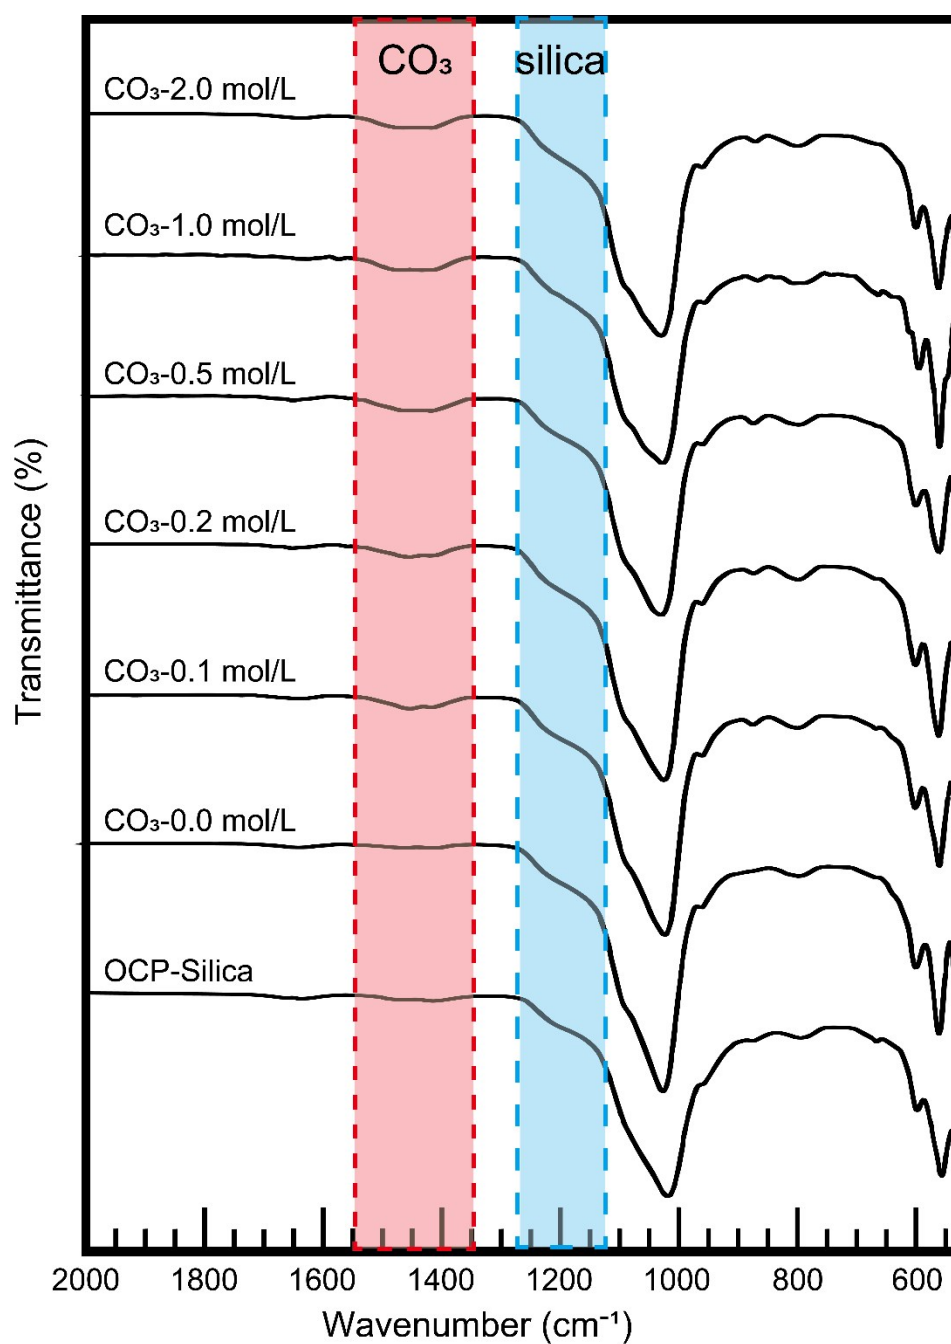

Figure S2. FT-IR spectra of OCP-silica treated in various (NH<sub>4</sub>)<sub>2</sub>CO<sub>3</sub> solutions.

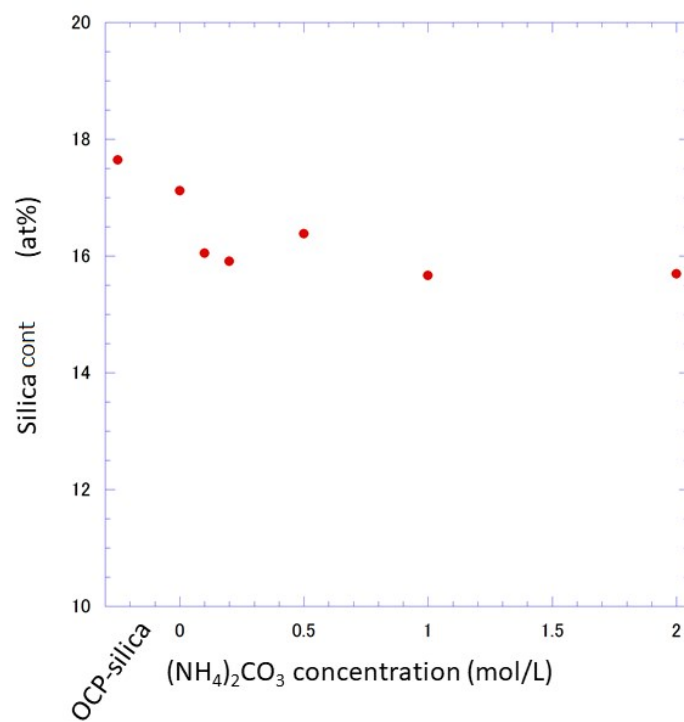

Figure S3. Silica contents of OCP-silica treated in various  $(\text{NH}_4)_2\text{CO}_3$  solutions.

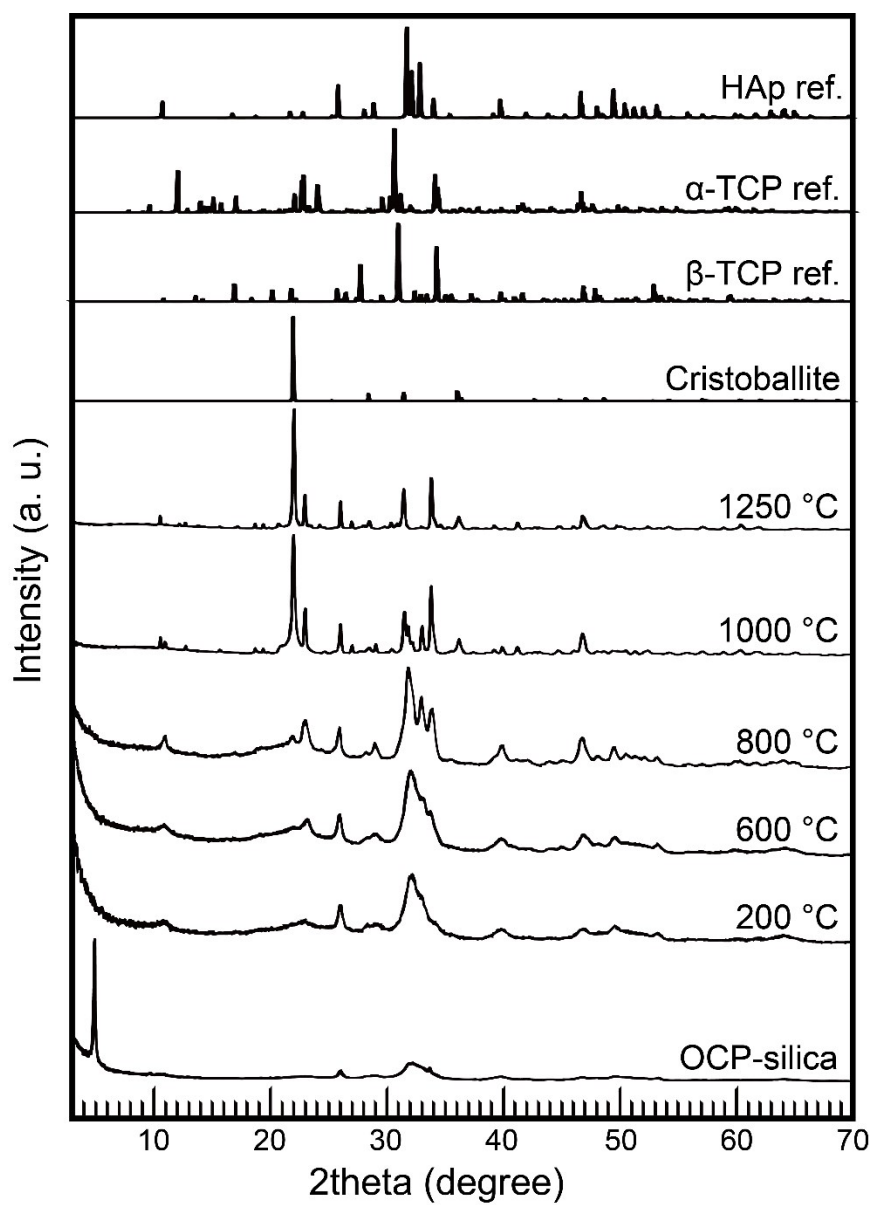

Figure S4. XRD patterns of OCP-silica subjected to heat treatment.

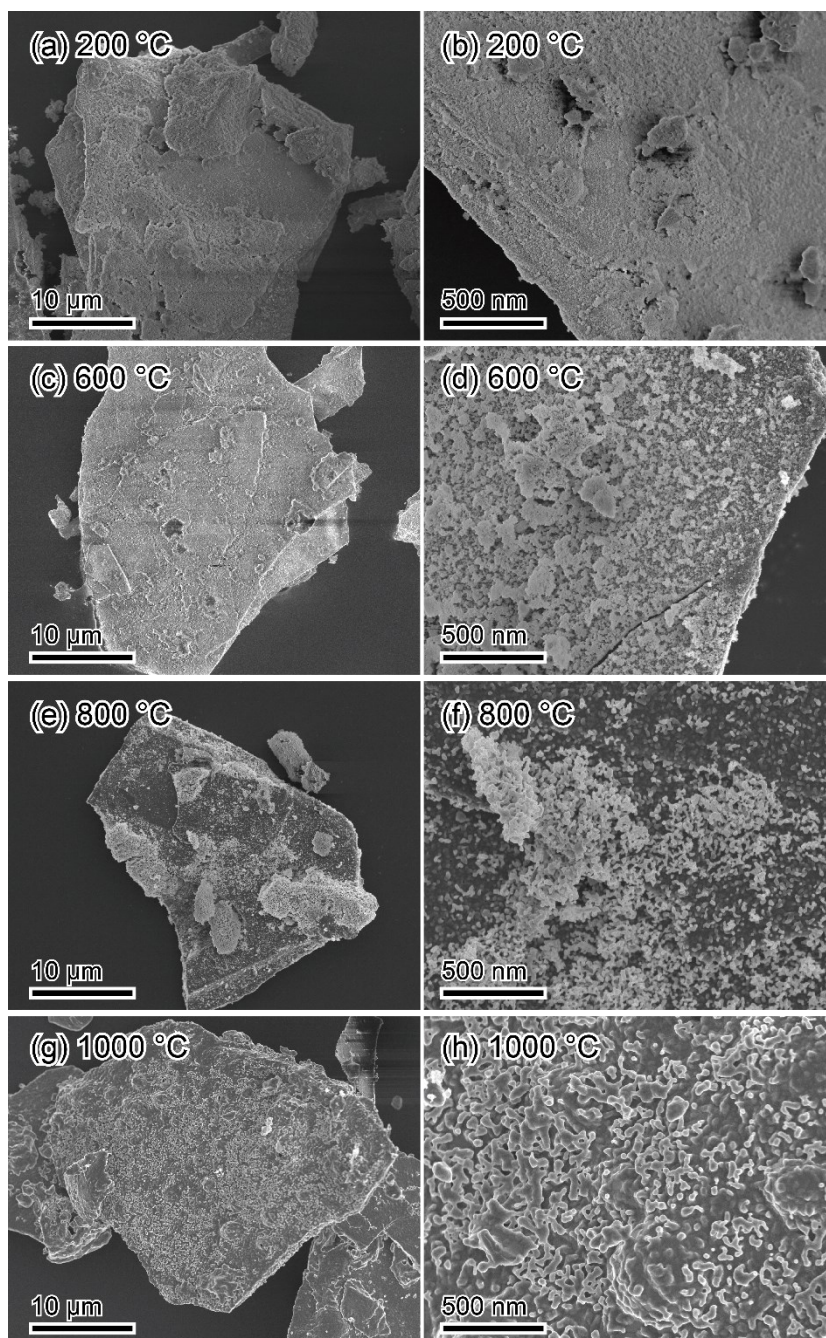

Figure S5. SEM micrographs of OCP-silica subjected to heat treatment. (a,b) 200 °C. (c,d) 600 °C. (e,f) 800 °C. (g,h) 1000 °C.

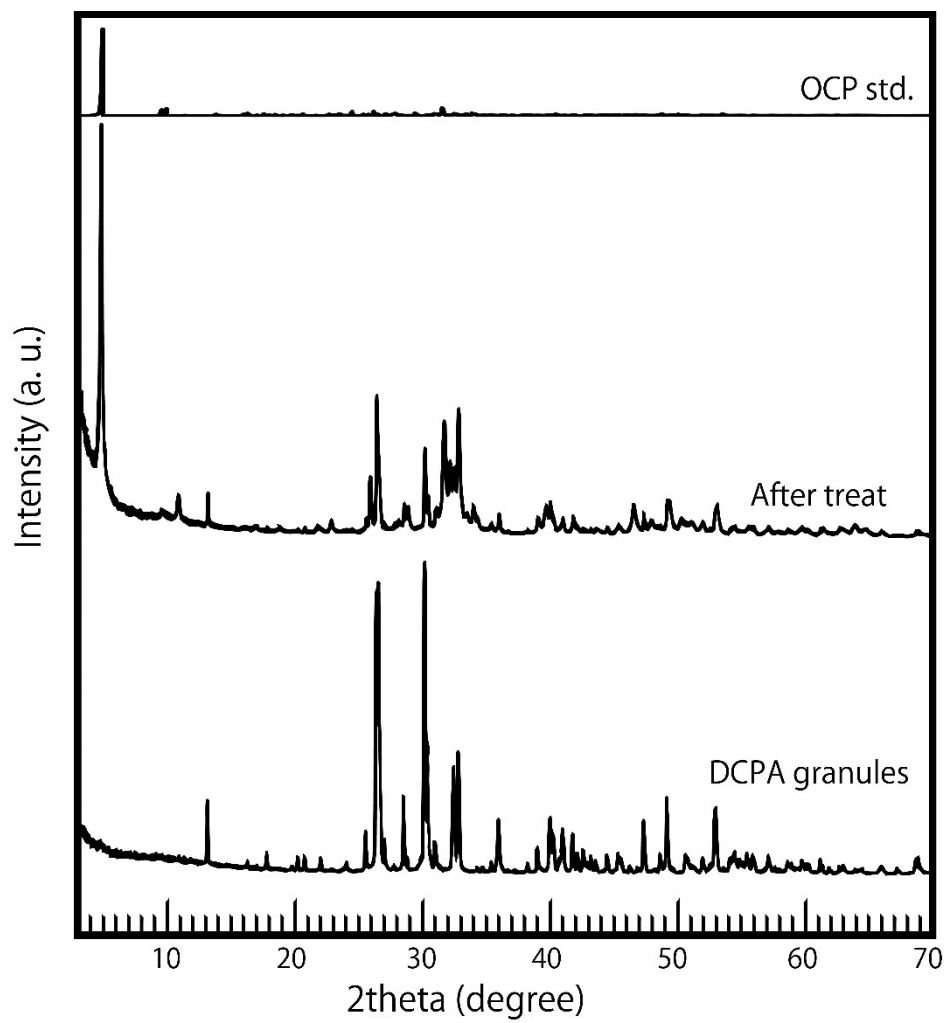

Figure S6. XRD patterns of DCPA granules before and after treatment in 1 mol/L  $\text{Na}_2\text{SiO}_3$ .



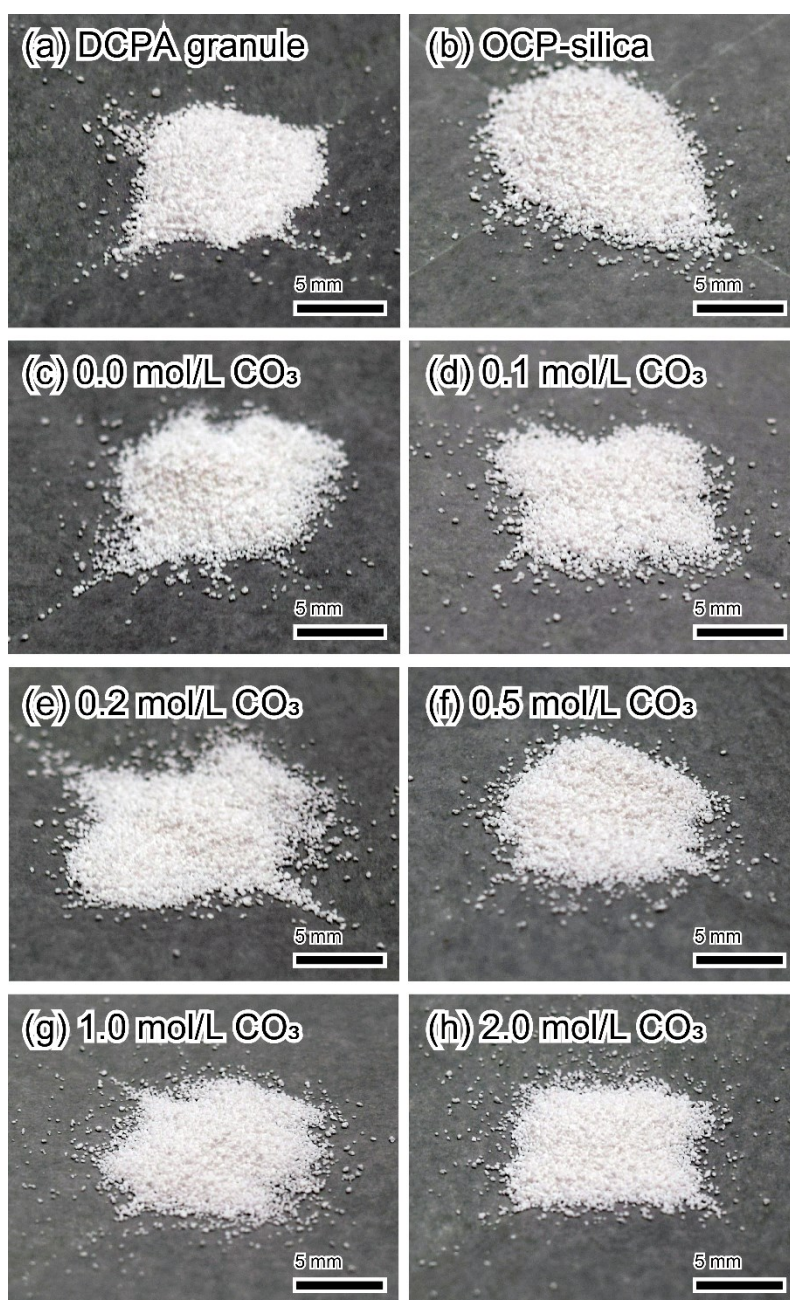

Figure S7. Photographs of (a) DCPA granules, (b) OCP-silica granules, and OCP-silica granules treated in (c)  $\text{H}_2\text{O}$ , (d) 0.1 mol/L, (e) 0.2 mol/L, (f) 0.5 mol/L, (g) 1.0 mol/L, and (h) 2.0 mol/L  $(\text{NH}_4)_2\text{CO}_3$  solutions.

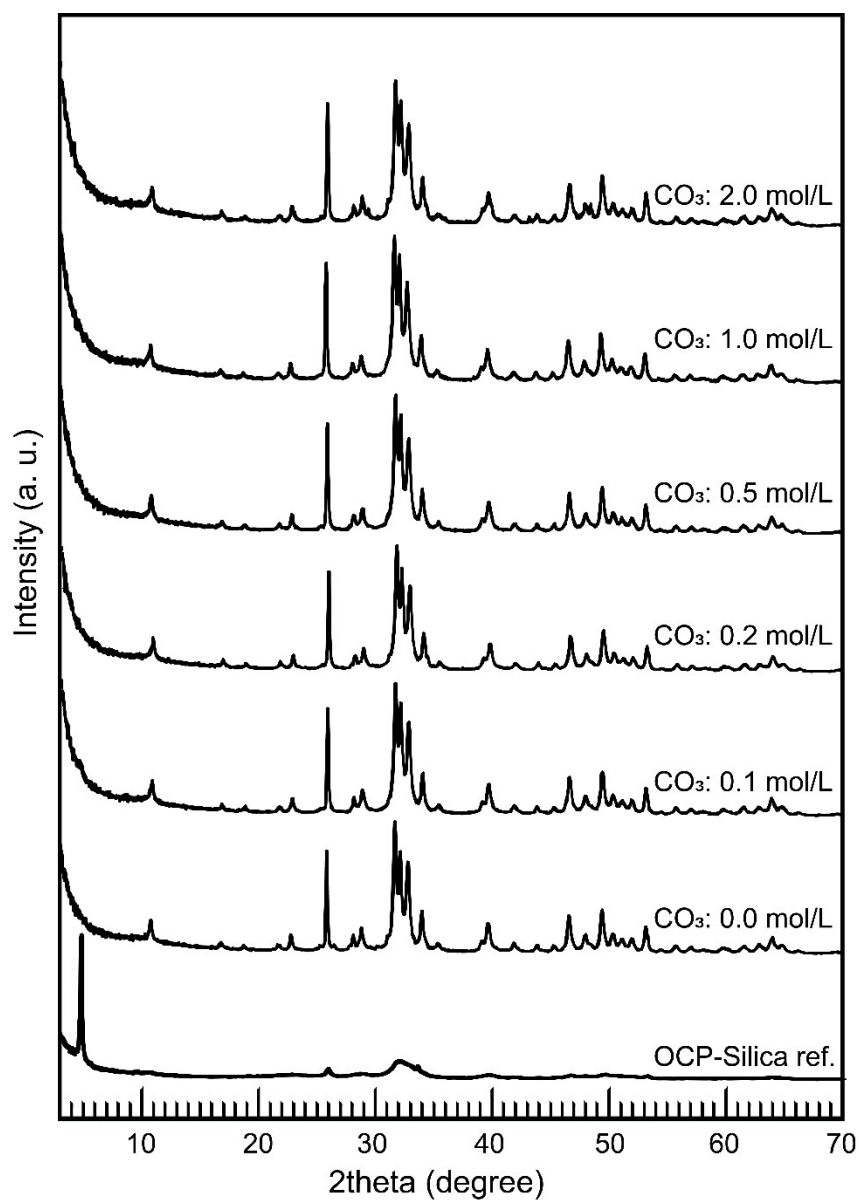

Figure S8. XRD patterns of OCP-silica granules treated in various  $(\text{NH}_4)_2\text{CO}_3$  solutions.

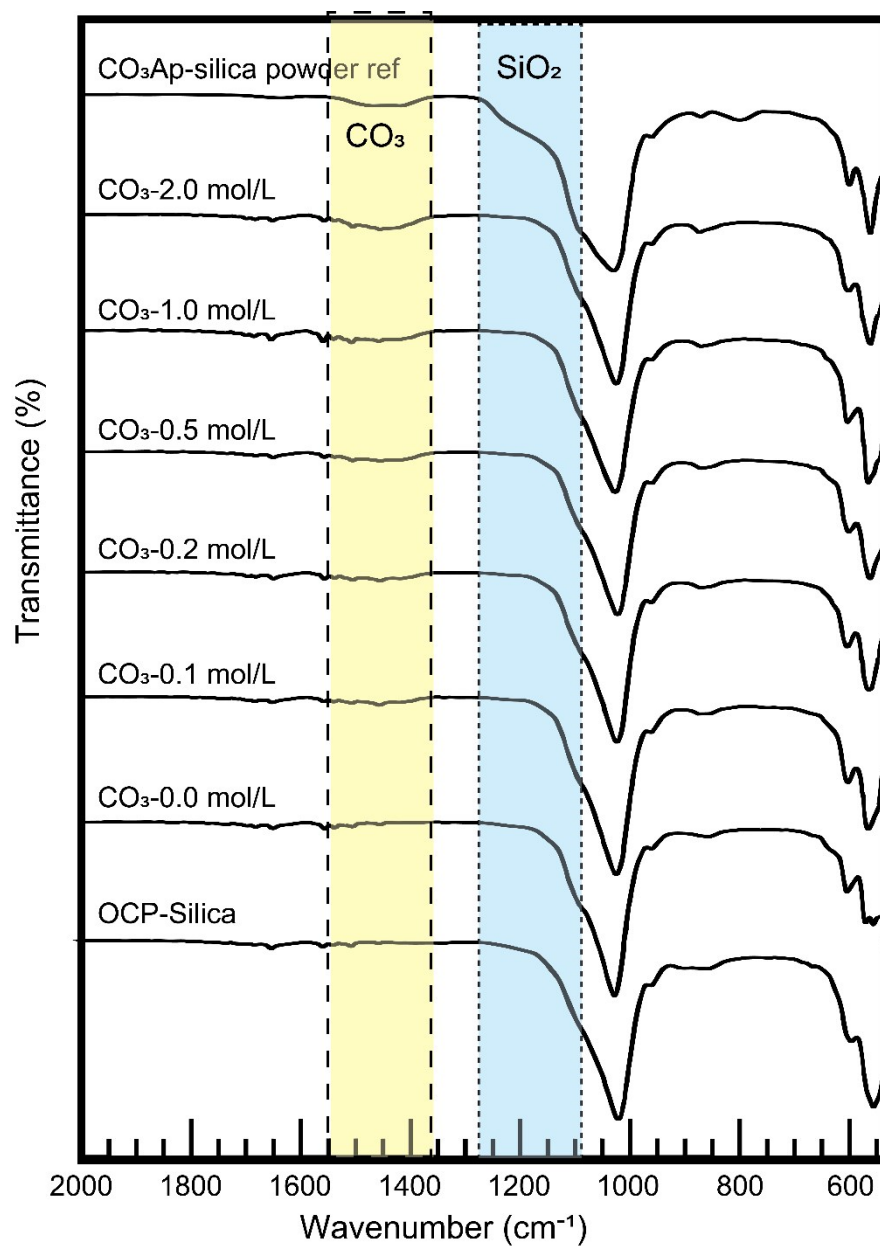

Figure S9. FT-IR spectra of OCP-silica granules treated in various (NH<sub>4</sub>)<sub>2</sub>CO<sub>3</sub> solutions.
